# Supplementary material for: Mechanically robust crystalline monolayer assemblies of oligosaccharide-based amphiphiles on water surfaces
Source: Royal Society of Chemistry journal article supplement (doi:10.1039/c9cc05629g), 2019-01-01
Supplement: c9cc05629g2.pdf [file c9cc05629g2.pdf]

Electronic Supplementary Information

**Mechanically robust crystalline monolayer assemblies of oligosaccharide-based  
amphiphiles on water surfaces**

Yusuke Yataka,<sup>a</sup> Shoki Tanaka,<sup>a</sup> Toshiki Sawada<sup>a,b</sup> and Takeshi Serizawa<sup>\*a</sup>

<sup>a</sup> Department of Chemical Science and Engineering, Tokyo Institute of Technology, 2-12-1

Ookayama, Meguro-ku, Tokyo 152-8550, Japan

<sup>b</sup> Precursory Research for Embryonic Science and Technology, Japan Science and Technology

Agency, 4-1-8 Honcho, Kawaguchi-shi, Saitama 332-0012, Japan

Fax: +81-3-5734-2128; E-mail: serizawa@polymer.titech.ac.jp

## Experimental details

**Materials.** Alkyl  $\beta$ -cellulosides were enzymatically synthesized following our previous report.<sup>1</sup> Octyl  $\beta$ -D-glucopyranoside (Glc-C<sub>8</sub>) was purchased from Dojindo Laboratories. Deuterated water was purchased from Sigma-Aldrich. All other reagents were purchased from Nacalai Tesque. Parafilm® was purchased from Bemis Company. Au substrates were purchased from TANAKA KIKINZOKU KOGYO K.K. Ultrapure water (>18.2 M $\Omega$ ·cm) was supplied by a Milli-Q system (Merck Millipore) and was used throughout all the experiments.

**Critical association concentration (CAC) measurements.** The CAC of alkyl  $\beta$ -cellulosides or Glc-C<sub>8</sub> was determined using a pyrene fluorescence method.<sup>2</sup> A pyrene solution dissolved in *N,N*-dimethylformamide (DMF) (5  $\mu$ L) was mixed with aqueous alkyl  $\beta$ -celluloside (0.00001-0.1% (w/v)) or Glc-C<sub>8</sub> (0.001-3.0% (w/v)) (495  $\mu$ L) solutions to prepare a final pyrene concentration of 500 nM. The emission spectra at 373 nm were recorded on a JASCO FP-6500 at 25 °C in a wavelength range between 300 and 350 nm with a resolution of 0.2 nm, an excitation slit of 5 nm, and an emission slit of 3 nm. The ratios of fluorescence intensities at 337.6 nm and 333.8 nm were plotted against alkyl  $\beta$ -celluloside or Glc-C<sub>8</sub> concentrations on a logarithmic scale and fitted to a sigmoidal curve. The CAC was determined as the intersection of the tangent to low-concentration points and the tangent to the inflection point.

**Pendant drop tensiometry.** Surface tensions of water droplets were measured with a Kyowa Interface Science Dropmaster DM-300 tensiometer and analysis software (FAMAS, version 5.0.26) by the pendant drop method. A water droplet (10  $\mu$ L) containing Cell-C<sub>8</sub> or Glc-C<sub>8</sub> was extruded from a 22G needle in a handmade closed system, which was constructed as follows. A disposable polystyrene cuvette (size: 1.2×1.2×4.5 cm) containing 1 mL of water was covered with a silicone cap and incubated for 30 min. Then, the needle was inserted into the air phase of the cuvette through a silicone cap. After 30 min, surface tension measurements were begun.

**Brewster angle microscopy (BAM).** Aqueous Cell-C<sub>8</sub> solution (0.01% (w/v), 26 mL) was spread on a glass petri dish ( $\Phi$  4.5 mm). BAM images were taken with a KSV NIMA MicroBAM with a resolution of approximately 12  $\mu$ m using a 20-30 mW laser at  $\lambda = 659$  nm under ambient conditions.

**Atomic force microscopy (AFM).** Aqueous Cell-C<sub>8</sub> solution (0.01% (w/v), 50  $\mu$ L) was mounted on Parafilm®. After adequate incubation time, a mica substrate was put in contact with the droplet surface. The residual solution was removed by using filter paper, and then the substrate was dried in a desiccator for at least 12 h. The AFM images were taken with a Shimadzu SPM-9600 in tapping mode under ambient conditions using an aluminum reflex-coating cantilever.

**Attenuated total reflection-Fourier transform infrared (ATR-FTIR) absorption spectroscopy.**

Aqueous Cell-C<sub>8</sub> solution (0.01% (w/v), 50  $\mu$ L) was mounted on Parafilm®. After 10 min of incubation, a gold-sputtered PET substrate was put in contact with the droplet surface. The residual solution was removed by using filter paper, and then the substrate was dried in a desiccator for at least 12 h. For a reference solution of Cell-C<sub>8</sub> in deuterated water, the solvent of Cell-C<sub>8</sub> solution (0.01% (w/v), 1 mL) was exchanged from ultrapure water to deuterated water through three centrifugation/redispersion cycles (20400 rpm using a TOMY MX-301 and MX-305). Then, the wet sample was collected by centrifugation. For another reference Cell-C<sub>8</sub> in the dried state, aqueous Cell-C<sub>8</sub> solution (0.01% (w/v), 20  $\mu$ L) was mounted on a gold-sputtered PET substrate and dried in a desiccator for 24 h. The ATR-FTIR absorption spectra were obtained on a JASCO FT/IR-4100 spectrometer with a cumulative number of 100 and a resolution of 2.0  $\text{cm}^{-1}$  under ambient conditions.

**Microscopy for droplet observations.** A water droplet (10  $\mu$ L) containing Cell-C<sub>8</sub> was extruded from a 22G needle in the aforementioned handmade closed system and was observed by using an AS ONE DX-012B digital microscope. The surface area of the droplet was estimated from the digital

image.<sup>3</sup> The surface area at the onset of buckling ( $S_b$ ) was defined as the surface area of the droplet when the contact angle ( $\theta$ ) in the following figure sharply increased against a decrease in droplet volume.

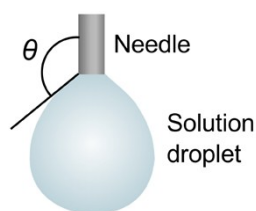

**Stacking of two droplets.** A water droplet (10  $\mu\text{L}$ ) containing 0.01% (w/v) Cell- $\text{C}_8$  and 100  $\mu\text{M}$  methylene blue (MB) was extruded from a 22G needle in air. After adequate incubation time, the volume of the droplet was decreased to obtain the buckling state, and the droplet was mounted on a Parafilm<sup>®</sup>. Then, a water droplet (10  $\mu\text{L}$ ) containing 0.01% (w/v) Cell- $\text{C}_8$  without MB was extruded from a 22G needle in air. After adequate incubation time, the volume of the droplet was decreased to obtain the buckling state, and the droplet was stacked on the premounted droplet. After 5 min of incubation, the upper droplet (2  $\mu\text{L}$ ) was partially collected for an ultraviolet-visible (UV-vis) absorption spectrum, which was measured on a Thermo Fisher Scientific Nanodrop2000c spectrometer under ambient conditions.

**Stacking of multiple droplets.** A water droplet (10  $\mu\text{L}$ ) containing 0.01% (w/v) Cell- $\text{C}_8$  was extruded from a 22G needle in air. After adequate incubation time, the volume of the droplet was decreased to obtain the buckling state. The droplet was stacked multiply on a Parafilm<sup>®</sup>.

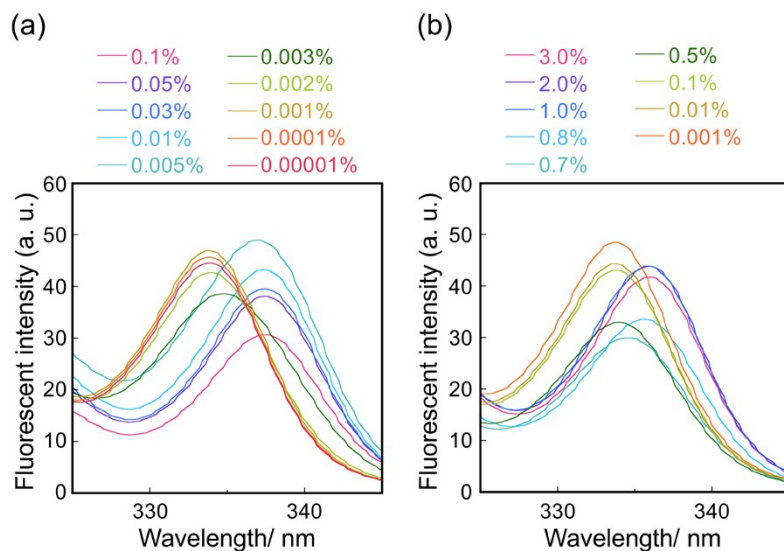

**Fig. S1** Excitation spectra of pyrene at different (a) Cell-C<sub>8</sub> and (b) Glc-C<sub>8</sub> concentrations. The fluorescence peak redshifted from approximately 333.8 nm to 337.6 nm above a threshold concentration.

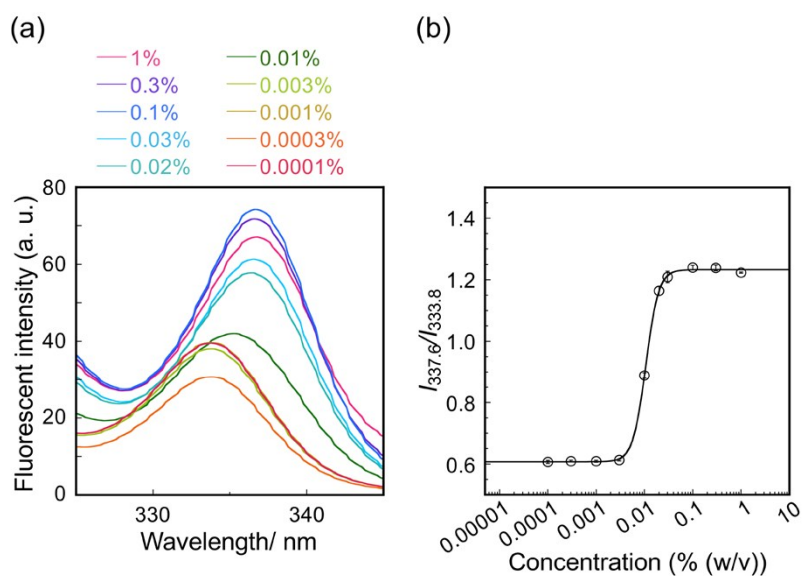

**Fig. S2** (a) Excitation spectra of pyrene at different hexyl β-celluloside concentrations. (b) Dependence of  $I_{337.6}/I_{333.8}$  for the excitation spectra of pyrene on the hexyl β-celluloside concentration.

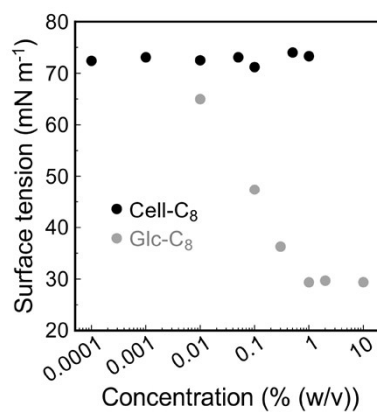

**Fig. S3** Dependence of the surface tension of aqueous Cell-C<sub>8</sub> or Glc-C<sub>8</sub> solution on the concentration.

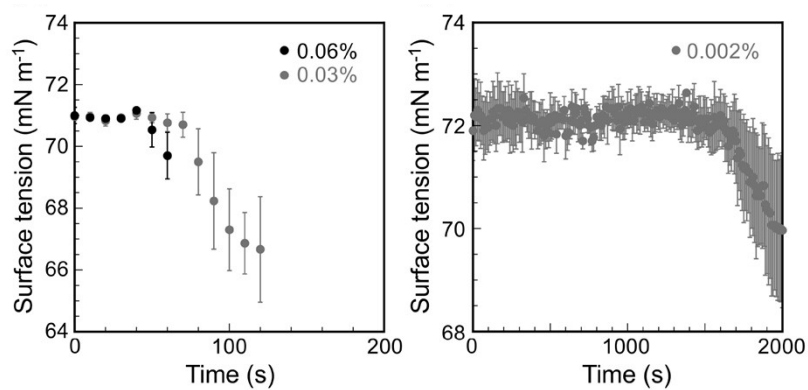

**Fig. S4** Time dependence of the surface tension at high and low Cell-C<sub>8</sub> concentrations.

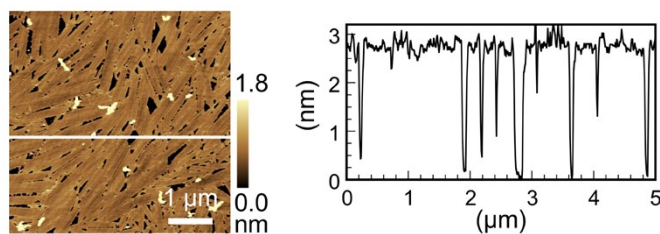

**Fig. S5** Cross-sectional AFM image of the 2D objects of Cell-C<sub>8</sub> after 60 sec of incubation.

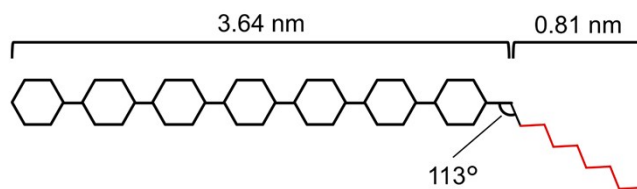

**Fig. S6** The estimated molecular length of octyl  $\beta$ -celloheptaose. The molecular length of the celloheptaose moiety was estimated from the structure of the cellulose I allomorph.<sup>4</sup> The bond angle of methyl  $\beta$ -cellotrioside was applied to the bond angle between the cellulose oligomer and alkyl group according to a previous report.<sup>5</sup>

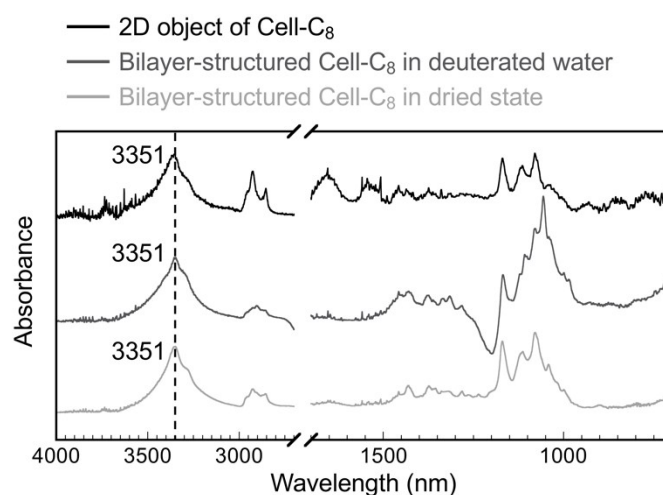

**Fig. S7** ATR-FTIR absorption spectra of the 2D objects of Cell-C<sub>8</sub> transferred on a gold-sputtered PET substrate from water surfaces (top) and bilayer-structured Cell-C<sub>8</sub> in deuterated water (middle) or in a dried state (bottom).

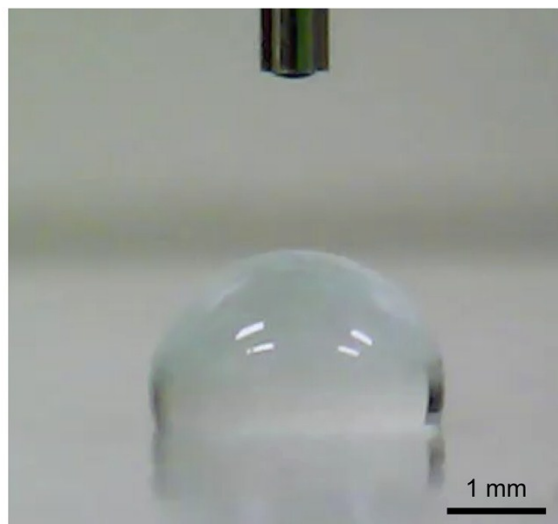

**Fig. S8** Microscopic image after the MB-containing water droplet covered with Cell-C<sub>8</sub> monolayers was stacked with a pure water droplet.

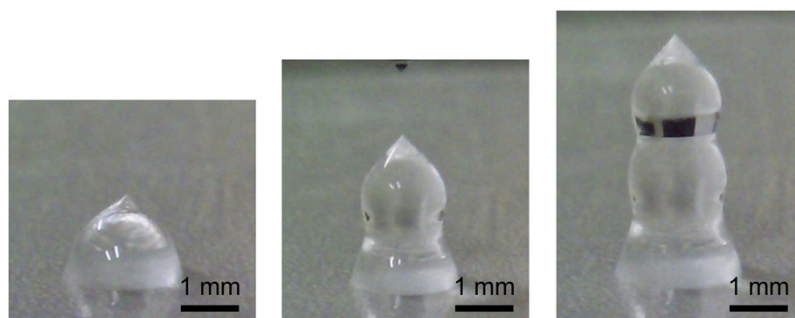

**Fig. S9** Microscopic images after stacking of multiple droplets.



## References

- 1 Y. Yataka, T. Sawada and T. Serizawa, *Langmuir*, 2016, **32**, 10120-10125.
- 2 M. Wilhelm, C.-L. Zhao, Y. Wang, R. Xu, M. A. Winnik, J.-L. Mura, G. Riess and M. D. Croucher, *Macromolecules*, 1991, **24**, 1033-1040.
- 3 P. A. Arundel and R. D. Bagnall, *J. Phys. Chem.*, 1977, **81**, 2079-2085.
- 4 Y. Nishiyama, P. Langan and H. Chanzy, *J. Am. Chem. Soc.*, 2002, **124**, 9074-9082.
- 5 S. Raymond, B. Henrissat, D. T. Qui, Å. Kvik and H. Chanzy, *Carbohydr. Res.*, 1995, **227**, 209-229.
